# Supplementary material for: Synthesis of new alendronate analogs for bone-targeted drug delivery strategies
Source: Royal Society of Chemistry journal article supplement (doi:10.1039/d3nj04980a), 2023-12-19
Supplement: d3nj04980a1.pdf [file d3nj04980a1.pdf]

## Supplementary information

### Synthesis of new alendronate analogs for bone-targeted drug delivery strategies

Nicolas Guedeney,<sup>\*a</sup> Julia Deschamp,<sup>a</sup> Thibaut Legigan,<sup>a</sup> Maëlle Monteil,<sup>a</sup> Evelyne Migianu-Griffoni<sup>\*a</sup> and Marc Lecouvey<sup>\*a</sup>

<sup>a</sup> Department of Chemistry, Université Sorbonne Paris Nord, UMR CNRS 7244;  
1 rue de Chablis, F-93000 Bobigny, France.  
*Email:* nicolas.guedeney@gmail.com

### Table of contents

|      |                                                                |        |
|------|----------------------------------------------------------------|--------|
| I.   | Mechanism of tetraester bisphosphonate isomerization           | S2     |
| II.  | <sup>31</sup> P{ <sup>1</sup> H} NMR monitoring                | S3     |
| II.  | Experimental procedures and characterization data of compounds | S4-S8  |
| III. | NMR spectra of compounds                                       | S9-S20 |

## I. Mechanism of tetraester bisphosphonate isomerization

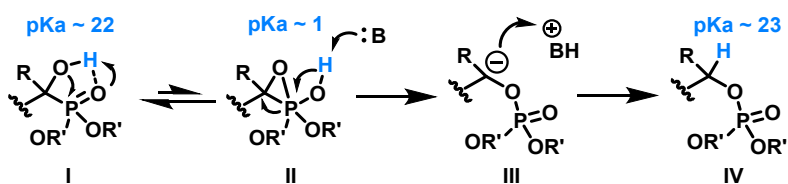

**Scheme S1:** Mechanism of tetraester bisphosphonate isomerization  
(from Niemi *et al.*, 2000).

The pKa of the central alcohol is ~22, where the proton is typically not easily captured from the structure. Through intramolecular hydrogen bonding (I) and structure rearrangement, the intermediate product II is formed, for which pKa is ~1. The base is able to capture the proton to produce III, which takes the proton back from the base, and forms IV.

## II. $^{31}\text{P}\{^1\text{H}\}$ NMR monitoring

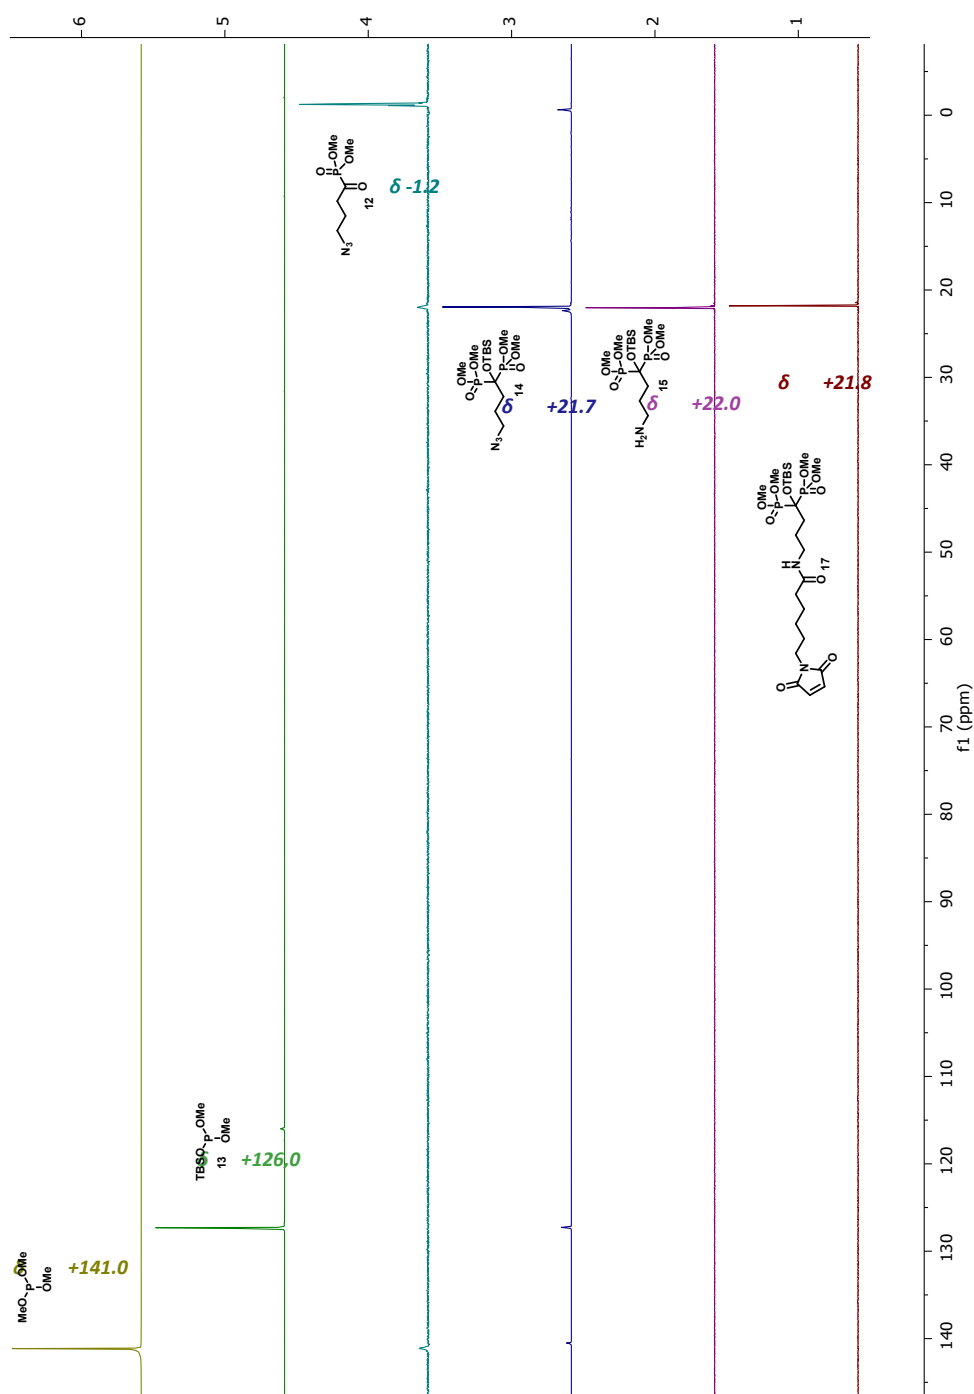

**Scheme S2:**  $^{31}\text{P}\{^1\text{H}\}$  NMR monitoring of phosphorus derivatives **12** to **17** synthesis (in  $\text{CDCl}_3$ ; full spectra)

### III. Experimental procedures and characterization data of compounds

#### General remarks

Chemicals were purchased from common commercial suppliers (Sigma-Aldrich, Alfa Aesar, Acros Organics) and used as delivered. All solvents were extra-dried grade or distilled prior to use. Reactions requiring inert conditions were carried out in flame-dried glassware under an argon atmosphere.

NMR spectra were recorded at room temperature on a Bruker Avance-III-400 spectrometer ( $^1\text{H}$ , 400 MHz;  $^{13}\text{C}$ , 101 MHz;  $^{31}\text{P}$ , 162 MHz). Chemical shifts ( $\delta$ ) were given in ppm and coupling constants  $J$  in Hz.  $^1\text{H}$  NMR (400 MHz) spectra were calibrated based on the nondeuterated solvent residual peak ( $\text{CDCl}_3$ : 7.26 ppm), while  $\text{H}_3\text{PO}_4$  (85% in water) was used as an external standard for  $^{31}\text{P}$  NMR (162 MHz) notably for the monitoring of the reaction. The following abbreviations were used for  $^1\text{H}$ ,  $^{13}\text{C}$  and  $^{31}\text{P}$  NMR (162 MHz) spectra to indicate the signal multiplicity: *s* (singlet), *bs* (broad singlet), *d* (doublet), *dt* (doublet of triplets), *dm* (doublet of multiplets), *t* (triplet), *td* (triplet of doublets), and *m* (multiplet). All  $^{13}\text{C}$  NMR (101 MHz) spectra were measured with  $^1\text{H}$  decoupling while  $^{31}\text{P}$  NMR (162 MHz) spectra were measured with  $^1\text{H}$  coupling (zoom on the spectrum) and  $^1\text{H}$  decoupling. The reactions were followed by  $^{31}\text{P}$  and  $^{31}\text{P}\{^1\text{H}\}$  NMR experiments (the spectra were recorded without lock and shims).

High-resolution mass spectra (HRMS) were performed on a Bruker maXis mass spectrometer in positive (ESI+) mode by the "Fédération de Recherche" ICOA/CBM (FR2708) platform. Analyses were performed using a Q-TOF Impact HD mass spectrometer equipped with the electrospray (ESI) ion source (Bruker Daltonics). The instrument was operated in the positive mode with an ESI source on a Q-TOF mass spectrometer with an accuracy tolerance of 2 ppm. Samples were diluted with acetonitrile and water (15:85) and were analyzed by mass spectrometry in continuous infusion using a syringe pump at 200  $\mu\text{L}/\text{min}$ . The mass profiles obtained by ESI-MS were analyzed using DataAnalysis software (Bruker Daltonics).

Infrared spectra were recorded on a ThermoFisher scientific Nicolet 380 FT-IR spectrometer. The Smart OMNI-Sampler Germanium ATR Sampling Accessory was used. The Smart OMNI-Sampler used an extremely rugged germanium ATR crystal. The wave numbers were expressed in  $\text{cm}^{-1}$  and comprised between 4000 and 675  $\text{cm}^{-1}$ . The samples were analyzed neat. The following abbreviations were used for IR spectra to indicate the signal intensities: *w* (weak), *m* (medium), *s* (strong), *br* (broad).

#### Methyl 4-azidobutanoate 9<sup>1</sup>

Methyl 4-bromobutanoate (1.26 mL, 10 mmol, 1 equiv.) was added to a sodium azide (780 mg, 12 mmol, 1.2 equiv.) suspension in anhydrous dimethylformamide (10 mL) at room temperature under argon. The reaction mixture was heated to 80°C for 16 h. Water (50 mL) was then added to the reaction mixture and the aqueous layer was extracted with  $\text{Et}_2\text{O}$  (3 x 100 mL). The organic layers were combined, washed with water (3 x 50 mL), brine (20 mL), dried over  $\text{MgSO}_4$  and concentrated under vacuum to afford the product 9 (1.43 g,

quantitative) as a yellow oil. **NMR <sup>1</sup>H (400 MHz, CDCl<sub>3</sub>):**  $\delta$  = 3.69 (s, 3H, OCH<sub>3</sub>), 3.35 (t, <sup>3</sup>J = 6.7 Hz, 2H, CH<sub>2</sub>N<sub>3</sub>), 2.42 (t, <sup>3</sup>J = 7.2 Hz, 2H, C(O)CH<sub>2</sub>), 1.95-1.87 (m, 2H, CH<sub>2</sub>); **NMR <sup>13</sup>C {<sup>1</sup>H} (101 MHz, CDCl<sub>3</sub>):**  $\delta$  = 173.3 (C(O)CH<sub>3</sub>), 51.9 (OCH<sub>3</sub>), 50.7 (CH<sub>2</sub>N<sub>3</sub>), 31.0 (C(O)CH<sub>2</sub>), 24.4 (CH<sub>2</sub>).

#### **4-Azidobutanoic acid 10<sup>1</sup>**

A solution of ester 9 (1.42 g, 9.9 mmol, 1 equiv.) in a 1:1 H<sub>2</sub>O/MeOH mixture (20 mL) and sodium hydroxide (596 mg, 14.9 mmol, 1.5 equiv.) was heated to reflux for 3 h. After concentration of the reaction mixture under vacuum, the residue was dissolved in water (10 mL) and the pH was adjusted to 1 with HCl 37%. The reaction mixture was cooled to room temperature. The aqueous layer was extracted with Et<sub>2</sub>O (3 x 30 mL). The organic layers were combined, washed with brine (30 mL), dried over MgSO<sub>4</sub> and concentrated under vacuum to afford the acid 10 (1.28 g, quantitative) as a yellow oil. **Rf:** 0.26 (PE/EtOAc 80:20); **NMR <sup>1</sup>H (400 MHz, CDCl<sub>3</sub>):**  $\delta$  = 3.38 (t, <sup>3</sup>J = 6.7 Hz, 2H, CH<sub>2</sub>N<sub>3</sub>), 2.47 (t, <sup>3</sup>J = 7.2 Hz, 2H, C(O)CH<sub>2</sub>), 1.96-1.87 (m, 2H, CH<sub>2</sub>); **NMR <sup>13</sup>C {<sup>1</sup>H} (101 MHz, CDCl<sub>3</sub>):**  $\delta$  = 179.0 (C(O)OH), 50.6 (CH<sub>2</sub>N<sub>3</sub>), 31.0 (C(O)CH<sub>2</sub>), 24.1 (CH<sub>2</sub>).

#### **4-Azidobutanoyl chloride 11<sup>1</sup>**

Oxalyl chloride (0.67 mL, 7.8 mmol, 1.5 equiv.) was added dropwise to a solution of carboxylic acid 10 (671 mg, 5.2 mmol, 1 equiv.) in anhydrous CH<sub>2</sub>Cl<sub>2</sub> (10 mL), under argon, cooled to 0°C, followed by one drop of dry dimethylformamide. After stirring for 2 h at room temperature, the reaction mixture was concentrated under vacuum at 5°C. After several co-evaporations with dry CH<sub>2</sub>Cl<sub>2</sub> and Et<sub>2</sub>O, the crude product 11 (760 mg, quantitative) was obtained as a thick yellow oil. The crude oil was used immediately without further purification. **NMR <sup>1</sup>H (400 MHz, CDCl<sub>3</sub>):**  $\delta$  = 3.40 (t, <sup>3</sup>J = 6.5 Hz, 2H, CH<sub>2</sub>N<sub>3</sub>), 3.02 (t, <sup>3</sup>J = 7.1 Hz, 2H, C(O)CH<sub>2</sub>), 2.04-1.87 (m, 2H, CH<sub>2</sub>); **NMR <sup>13</sup>C {<sup>1</sup>H} (101 MHz, CDCl<sub>3</sub>):**  $\delta$  = 173.4 (C(O)Cl), 49.9 (CH<sub>2</sub>N<sub>3</sub>), 44.1 (C(O)CH<sub>2</sub>), 24.6 (CH<sub>2</sub>).

#### **Tert-butyldimethylsilyl dimethyl phosphite 13<sup>2</sup>**

Dimethyl phosphite (2.76 mL, 30 mmol, 1 equiv.) was added dropwise to a sodium hydride (1.08 g, 45 mmol, 1.5 equiv.) suspension in anhydrous THF (55 mL), under argon, cooled down to 0°C. The reaction mixture was heated to reflux for 2.5 h until the complete disappearance of dimethyl phosphite was confirmed by <sup>31</sup>P{<sup>1</sup>H} NMR analysis. After cooling to room temperature, *tert*-butyldimethylsilyl chloride (4.07 g, 27 mmol, 0.9 equiv.) was added and the reaction mixture was heated to reflux for 16 h. Insoluble salts were filtered on celite and the filtrate was concentrated under vacuum. After distillation under reduced pressure, product 13 (4.37 g, 65%) was obtained as a colorless oil. **NMR <sup>31</sup>P {<sup>1</sup>H} (162 MHz, CDCl<sub>3</sub>):**  $\delta$  = 127.3 (s); **NMR <sup>31</sup>P (162 MHz, CDCl<sub>3</sub>):**  $\delta$  = 127.5-127.2 (m); **NMR <sup>1</sup>H (400 MHz, CDCl<sub>3</sub>):**  $\delta$  = 3.82-3.68 (m, 6H, OCH<sub>3</sub>), 0.94 (s, 9H, Si(CH<sub>3</sub>)<sub>3</sub>), 0.28 (s, 6H, Si(CH<sub>3</sub>)<sub>2</sub>);

#### **Tetramethyl (4-azido-1-((*tert*-butyldimethylsilyl)oxy)-butylidene)-1,1-bisphosphonate 14**

Distilled trimethyl phosphite (614  $\mu$ L, 5.2 mmol, 1 equiv.) was added dropwise to a solution of acyl chloride **11** (767 mg, 5.2 mmol, 1 equiv.) in anhydrous THF (1 mL) and cooled to  $-15^{\circ}\text{C}$  under argon. After stirring 30 min at  $-15^{\circ}\text{C}$ , the reaction mixture was heated to room temperature and stirred for 45 min more. The disappearance of trimethyl phosphite and formation of dimethyl  $\alpha$ -ketophosphonate intermediate **12** were monitored by  $^{31}\text{P}\{^1\text{H}\}$  NMR analysis. After cooling back to  $0^{\circ}\text{C}$ , *tert*-butyldimethylsilyl dimethyl phosphite **13** (1.17 g, 5.2 mmol, 1 equiv.) was added dropwise to the reaction mixture. After stirring at room temperature for 1 h, the reaction mixture was concentrated under vacuum. Purification by silica gel column chromatography ( $\text{CH}_2\text{Cl}_2/\text{MeOH}$  gradient 100:0 to 96:4) afforded the bisphosphonate product **14** (1.39 g, 60%) as a colorless oil. **Rf**: 0.45 ( $\text{CH}_2\text{Cl}_2/\text{MeOH}$  96:4); **IR (KBr,  $\text{cm}^{-1}$ )**:  $\nu$  ( $\text{cm}^{-1}$ ) = 2957 (m, C-H), 2856 (m, C-H), 2098 (s,  $\text{N}_3$ ), 1254 (m, P-O- $\text{CH}_3$ ), 1143 (m, P=O), 1034 (s, C-O), 839 (m, P-O), 780 (m, P-C); **NMR  $^{31}\text{P}\{^1\text{H}\}$  (162 MHz,  $\text{CDCl}_3$ )**:  $\delta$  = 21.7 (s); **NMR  $^{31}\text{P}$  (162 MHz,  $\text{CDCl}_3$ )**:  $\delta$  = 22.0-21.3 (m); **NMR  $^1\text{H}$  (400 MHz,  $\text{CDCl}_3$ )**:  $\delta$  = 3.88-3.78 (m, 12H,  $\text{OCH}_3$ ), 3.28 (t,  $^3J$  = 6.5 Hz, 2H,  $\text{CH}_2\text{N}_3$ ), 2.20-2.01 (m, 2H,  $\text{CH}_2$ ), 2.01-1.86 (m, 2H,  $\text{CH}_2$ ), 0.90 (s, 9H,  $\text{SiC}(\text{CH}_3)_3$ ), 0.19 (s, 6H,  $\text{Si}(\text{CH}_3)_2$ ); **NMR  $^{13}\text{C}\{^1\text{H}\}$  (101 MHz,  $\text{CDCl}_3$ )**:  $\delta$  = 77.9 (t,  $^1J_{\text{CP}}$  = 157.2 Hz, PCP), 53.6 (dt,  $^2J_{\text{CP}}$  = 23.5 Hz,  $^5J_{\text{CP}}$  = 3.3 Hz,  $\text{OCH}_3$ ), 51.7 ( $\text{CH}_2\text{N}_3$ ), 33.1 ( $\text{CH}_2$ ), 25.8 ( $\text{SiC}(\text{CH}_3)_3$ ), 23.7 (t,  $^3J_{\text{CP}}$  = 5.7 Hz,  $\text{CH}_2$ ), 19.0 ( $\text{SiC}(\text{CH}_3)_3$ ), -2.8 ( $\text{Si}(\text{CH}_3)_2$ ); **MS (ESI+)**  $m/z$  : 446.16 [ $\text{M}+\text{H}$ ] $^+$ , 468.15 [ $\text{M}+\text{Na}$ ] $^+$ ; **HRMS (ESI+)** calculated for  $[\text{C}_{14}\text{H}_{34}\text{N}_3\text{O}_7\text{P}_2\text{Si}]$  : 446.1636 ; measured : 446.1640.

#### **2,5-Dioxopyrrolidin-1-yl 6-(2,5-dioxo-2,5-dihydro-1*H*-pyrrol-1-yl) hexanoate 16**

*N*-(3-dimethylaminopropyl)-*N'*-ethyl carbodiimide hydrochloride (2.88 g, 15 mmol, 1.5 equiv.) and *N*-hydroxysuccinimide (1.38 g, 12 mmol, 1.2 equiv.) were sequentially added to a solution of 6-(2,5-dioxo-2,5-dihydro-1*H*-pyrrol-1-yl) hexanoic acid (2.11 g, 10 mmol, 1 equiv.) in dry dimethylformamide (10 mL), cooled down to  $0^{\circ}\text{C}$ , under argon. The reaction mixture was heated to  $35^{\circ}\text{C}$  for 12 h. After cooling to room temperature, dichloromethane (200 mL) was added and the organic layer was successively washed with 5% aqueous  $\text{NaHCO}_3$  (50 mL), water (50 mL), brine (50 mL), dried over  $\text{MgSO}_4$  and concentrated under vacuum. Purification by silica gel column chromatography (PE/EtOAc 40:60) afforded the NHS-activated ester **16** (2.74 g, 83%) as a white solid. **Rf**: 0.47 (PE/EtOAc 40:60); **NMR  $^1\text{H}$  (400 MHz,  $\text{CDCl}_3$ )**:  $\delta$  = 6.68 (s, 2H,  $\text{CH}=\text{CH}$ ), 3.52 (t,  $^3J$  = 7.2 Hz, 2H,  $\text{NCH}_2$ ), 2.82 (s, 4H,  $\text{NC}(\text{O})\text{CH}_2$ ), 2.59 (t,  $^3J$  = 7.4 Hz, 2H,  $\text{CH}_2\text{C}(\text{O})$ ), 1.76 (q,  $^3J$  = 7.5 Hz, 2H,  $\text{CH}_2$ ), 1.62 (q,  $^3J$  = 7.5 Hz, 2H,  $\text{CH}_2$ ), 1.47-1.34 (m, 2H,  $\text{CH}_2$ ); **NMR  $^{13}\text{C}\{^1\text{H}\}$  (101 MHz,  $\text{CDCl}_3$ )**:  $\delta$  = 171.0 (2C,  $\text{NC}(\text{O})\text{CH}=\text{CH}$ ), 169.3 (2C,  $\text{NC}(\text{O})\text{CH}_2$ ), 169.0 ( $\text{C}(\text{O})\text{O}$ ), 134.2 (2C,  $\text{CH}=\text{CH}$ ), 37.6 ( $\text{NCH}_2$ ), 30.9 ( $\text{CH}_2\text{C}(\text{O})$ ), 28.2 ( $\text{CH}_2$ ), 25.9 ( $\text{CH}_2$ ), 25.7 ( $\text{NC}(\text{O})\text{CH}_2$ ), 24.2 ( $\text{CH}_2$ ); **Mp ( $^{\circ}\text{C}$ )**:  $75^{\circ}\text{C}$ .

**Tetramethyl (4-(6-(2,5-dioxo-2,5-dihydro-1H-pyrrol-1-yl)hexanamido)-1-((tert-butyl)dimethylsilyl)oxy)-butylidene)-1,1-bisphosphonate 17**

10% Pd/C (81 mg, 50% w/w) was added to a stirred solution of azide 14 (162 mg, 0.36 mmol, 1 equiv.) in ethyl acetate (6 mL) under argon. After three vacuum/H<sub>2</sub> cycles to remove argon from the reaction flask, 14 was hydrogenated (balloon) at room temperature for 1 h. The reaction was monitored by TLC ninhydrin assay (CH<sub>2</sub>Cl<sub>2</sub>/MeOH 96:4) and <sup>31</sup>P NMR (162 MHz) (for 15: <sup>31</sup>P {<sup>1</sup>H}: δ = 22.0 (s)) until the complete disappearance of the starting material. The reaction mixture was then filtered on a celite pad. To the crude organic layer containing the amine intermediate 15, NHS-activated ester 16 (111 mg, 0.36 mmol, 1 equiv.) and triethylamine (50 μL, 0.36 mmol, 1 equiv.) were sequentially added. The reaction mixture was stirred to room temperature for 2 h, until the complete disappearance of the amine 15. The organic layer was then washed with water (3 x 10 mL), brine (10 mL), dried over MgSO<sub>4</sub> and concentrated under vacuum. Purification by silica gel column chromatography (CH<sub>2</sub>Cl<sub>2</sub>/MeOH gradient 100:0 to 96:4) afforded the bisphosphonate product 17 (206 mg, 94%) as a pale-yellow oil. **Rf**: 0.48 (CH<sub>2</sub>Cl<sub>2</sub>/MeOH 95:5); **IR (KBr, cm<sup>-1</sup>)**: ν (cm<sup>-1</sup>) = 3309 (br, NH), 3087 (w, =C-H), 2957 (m, C-H), 2856 (m, C-H), 1708 (s, NC=O), 1655 (m, NC=O), 1250 (s, P-O-CH<sub>3</sub>), 1143 (w, P=O), 1038 (s, C-O), 837 (m, P-O), 781 (m, P-C); **NMR <sup>31</sup>P {<sup>1</sup>H} (162 MHz, CDCl<sub>3</sub>)**: δ = 21.8 (s); **NMR <sup>31</sup>P (162 MHz, CDCl<sub>3</sub>)<sub>3</sub>**: δ = 22.1-21.6 (m); **NMR <sup>1</sup>H (400 MHz, CDCl<sub>3</sub>)<sub>3</sub>**: δ = 6.67 (s, 2H, CH=CH), 5.75 (t, <sup>3</sup>J = 4.8 Hz, 1H, C(O)NH), 3.88-3.69 (m, 12H, OCH<sub>3</sub>), 3.49 (t, <sup>3</sup>J = 7.2 Hz, 2H, NCH<sub>2</sub>), 3.28-3.14 (m, 2H, C(O)NHCH<sub>2</sub>), 2.13 (t, <sup>3</sup>J = 7.6 Hz, 2H, CH<sub>2</sub>C(O)), 2.10-1.95 (m, 2H, CH<sub>2</sub>), 1.89-1.74 (m, 2H, CH<sub>2</sub>), 1.71-1.51 (m, 4H, CH<sub>2</sub>), 1.40-1.18 (m, 2H, CH<sub>2</sub>), 0.87 (s, 9H, SiC(CH<sub>3</sub>)<sub>3</sub>), 0.15 (s, 6H, Si(CH<sub>3</sub>)<sub>2</sub>); **NMR <sup>13</sup>C {<sup>1</sup>H} (101 MHz, CDCl<sub>3</sub>)<sub>3</sub>**: δ = 172.9 (C(O)NH), 171.0 (2C, NC(O)CH=CH), 134.2 (CH=CH), 78.2 (t, <sup>1</sup>J<sub>CP</sub> = 157.6 Hz, PCP), 53.7 (dt, <sup>2</sup>J<sub>CP</sub> = 18.6 Hz, <sup>5</sup>J<sub>CP</sub> = 3.5 Hz, OCH<sub>3</sub>), 39.7 (C(O)NHCH<sub>2</sub>), 37.7 (NCH<sub>2</sub>), 36.6 (CH<sub>2</sub>C(O)), 33.2 (CH<sub>2</sub>), 28.4 (CH<sub>2</sub>), 26.5 (CH<sub>2</sub>), 25.9 (SiC(CH<sub>3</sub>)<sub>3</sub>), 25.2 (CH<sub>2</sub>), 24.0 (t, <sup>3</sup>J<sub>CP</sub> = 5.0 Hz, CH<sub>2</sub>), 19.1 (SiC(CH<sub>3</sub>)<sub>3</sub>), -2.57 (Si(CH<sub>3</sub>)<sub>2</sub>); **MS (ESI+)** m/z: 613.25 [M+H]<sup>+</sup>, 635.23 [M+Na]<sup>+</sup>, 326.10 [M+Ca]<sup>2+</sup>, 335.11 [M+Ca+H<sub>2</sub>O]<sup>2+</sup>; **HRMS (ESI+)** calculated for [C<sub>24</sub>H<sub>47</sub>N<sub>2</sub>O<sub>10</sub>P<sub>2</sub>Si] : 613.2470 ; measured: 613,2461.

**3-((1-(6-((4-((Tert-butyl)dimethylsilyl)oxy)-4,4-bis(dimethoxyphosphoryl)butyl)amino)-6-oxohexyl)-2,5-dioxopyrrolidin-3-yl)thio)propanoic acid 18**

3-Mercaptopropanoic acid (31 μL, 0.35 mmol, 1.2 equiv.) and triethylamine (48 μL, 0.35 mmol, 1.2 equiv.) were added to a solution of maleimide-bisphosphonate 17 (180 mg, 0.30 mmol, 1 equiv.) in dry dichloromethane (4 mL), under argon. After stirring at room temperature for 2 h, the reaction mixture was washed with water (3 x 5 mL), brine (5 mL), dried over MgSO<sub>4</sub> and concentrated under vacuum to afford the pure thia-Michael addition product 18 (220 mg, quantitative) as a yellow oil.

**Rf**: 0.57 (CH<sub>2</sub>Cl<sub>2</sub>/MeOH 95:5); **IR (KBr, cm<sup>-1</sup>)**: ν (cm<sup>-1</sup>) = 3373 (br, OH), 2956 (m, C-H), 2856 (m, C-H), 1775 (m, OC=O), 1703 (s, NC=O), 1650 (m, NC=O), 1248 (s, P-O-CH<sub>3</sub>), 1148 (m, P=O), 1041

(s, C-O), 839 (m, P-O), 781 (m, P-C); **NMR  $^{31}\text{P}$   $\{^1\text{H}\}$  (162 MHz,  $\text{CDCl}_3$ ):**  $\delta$  = 21.2 (s); **NMR  $^{31}\text{P}$  (162 MHz,  $\text{CDCl}_3$ ):**  $\delta$  = 21.5-20.9 (m); **NMR  $^1\text{H}$  (400 MHz,  $\text{CDCl}_3$ ):**  $\delta$  = 6.52-6.46 (m, 1H, C(O)NH), 3.87-3.79 (m, 12H, OCH<sub>3</sub>), 3.76 (dd,  $^3J$  = 9.0 Hz,  $^3J$  = 3.3 Hz, 1H, SCH), 3.57 (t,  $^3J$  = 5.9 Hz, 2H, NCH<sub>2</sub>), 3.32-3.19 (m, 2H, C(O)NHCH<sub>2</sub>), 3.13 (dd,  $^2J$  = 18.8 Hz,  $^3J$  = 9.0 Hz, 1H, SCH-CH<sub>2</sub>-C(O)), 2.96 (t,  $^3J$  = 7.3 Hz, 2H, CH<sub>2</sub>S), 2.77-2.61 (m, 2H, HOC(O)CH<sub>2</sub>), 2.57 (dd,  $^2J$  = 18.8 Hz,  $^3J$  = 3.3 Hz, 1H, SCH-CH<sub>2</sub>-C(O)), 2.22-2.15 (m, 2H, CH<sub>2</sub>C(O)), 2.14-2.02 (m, 2H, CH<sub>2</sub>), 1.90-1.79 (m, 2H, CH<sub>2</sub>), 1.76-1.54 (m, 4H, CH<sub>2</sub>), 1.39-1.28 (m, 2H, CH<sub>2</sub>), 0.88 (s, 9H, SiC(CH<sub>3</sub>)<sub>3</sub>), 0.16 (s, 6H, Si(CH<sub>3</sub>)<sub>2</sub>); **NMR  $^{13}\text{C}$   $\{^1\text{H}\}$  (101 MHz,  $\text{CDCl}_3$ ):**  $\delta$  = 176.5 (C(O)N), 174.8 (C(O)N), 173.8 (C(O)NH), 173.6 (C(O)OH), 78.1 (t,  $^1J_{\text{CP}}$  = 159.1 Hz, PCP), 53.9 (dt,  $^2J_{\text{CP}}$  = 21.1 Hz,  $^5J_{\text{CP}}$  = 3.5 Hz, OCH<sub>3</sub>), 40.0 (SCH), 39.6 (C(O)NHCH<sub>2</sub>), 38.5 (NCH<sub>2</sub>), 36.6 (CH<sub>2</sub>C(O)), 36.0 (SCH-CH<sub>2</sub>-C(O)), 34.1 (HOC(O)CH<sub>2</sub>), 33.1 (CH<sub>2</sub>), 27.1 (CH<sub>2</sub>), 26.0 (CH<sub>2</sub>), 25.9 (CH<sub>2</sub>S), 25.8 (SiC(CH<sub>3</sub>)<sub>3</sub>), 25.4 (CH<sub>2</sub>), 23.7 (t,  $^3J_{\text{CP}}$  = 4.8 Hz, CH<sub>2</sub>), 19.0 (SiC(CH<sub>3</sub>)<sub>3</sub>), -2.5 (Si(CH<sub>3</sub>)<sub>2</sub>).

**MS (ESI+)** m/z: 719.25 [M+H]<sup>+</sup>, 741.24 [M+Na]<sup>+</sup>, 379.10 [M+Ca]<sup>2+</sup>; **HRMS (ESI+)** calculated for [C<sub>27</sub>H<sub>53</sub>N<sub>2</sub>O<sub>12</sub>P<sub>2</sub>SSi] : 719.2558; measured: 719.2547.

#### Reference:

1. J. Dussart, N. Guedeney, J. Deschamp, M. Monteil, O. Gager, T. Legigan, E. Migianu-Griffoni and M. Lecouvey, *Org. Biomol. Chem.*, 2018, **16**, 6969–6979.
2. T. Yokomatsu, Y. Yoshida and S. Shibuya, *J. Org. Chem.*, 1994, **59**, 7930–7933.



### III. NMR Spectra of compounds

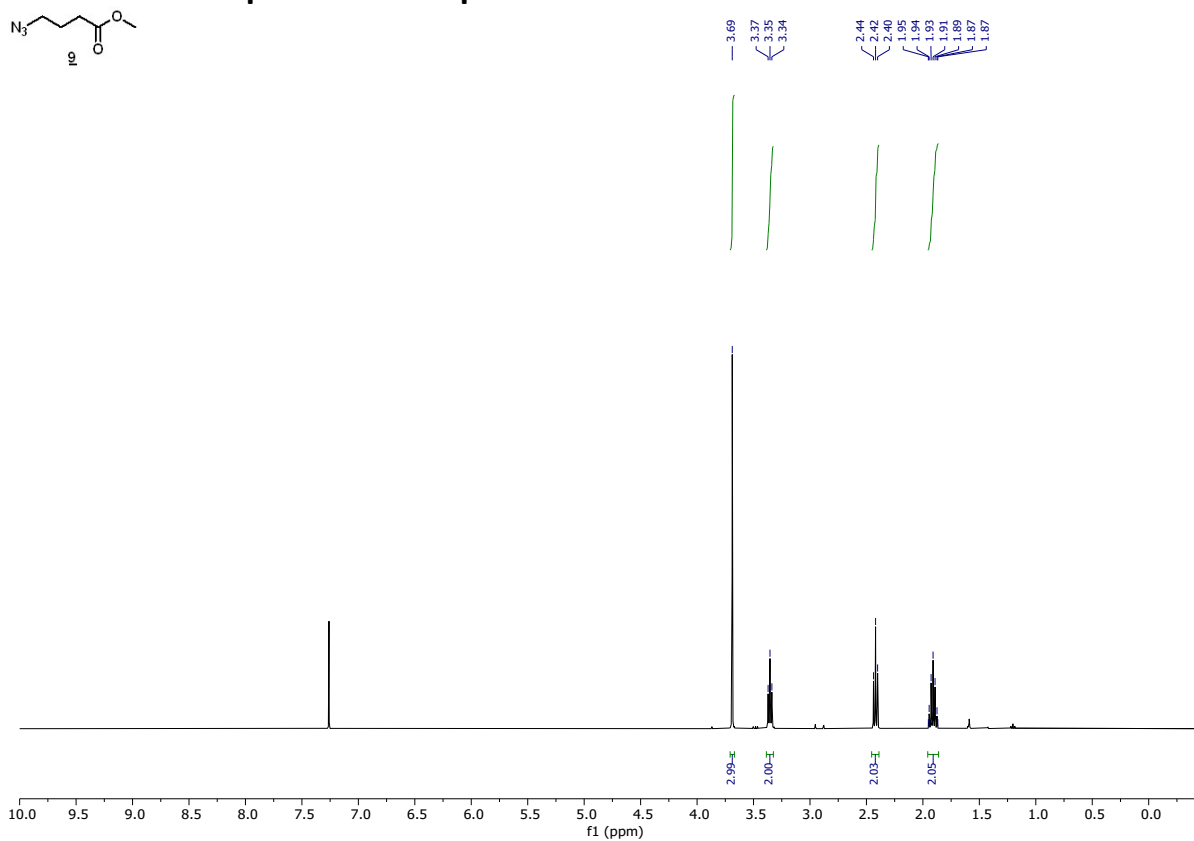

Figure S1: Full <sup>1</sup>H NMR (400 MHz) spectrum for **9**

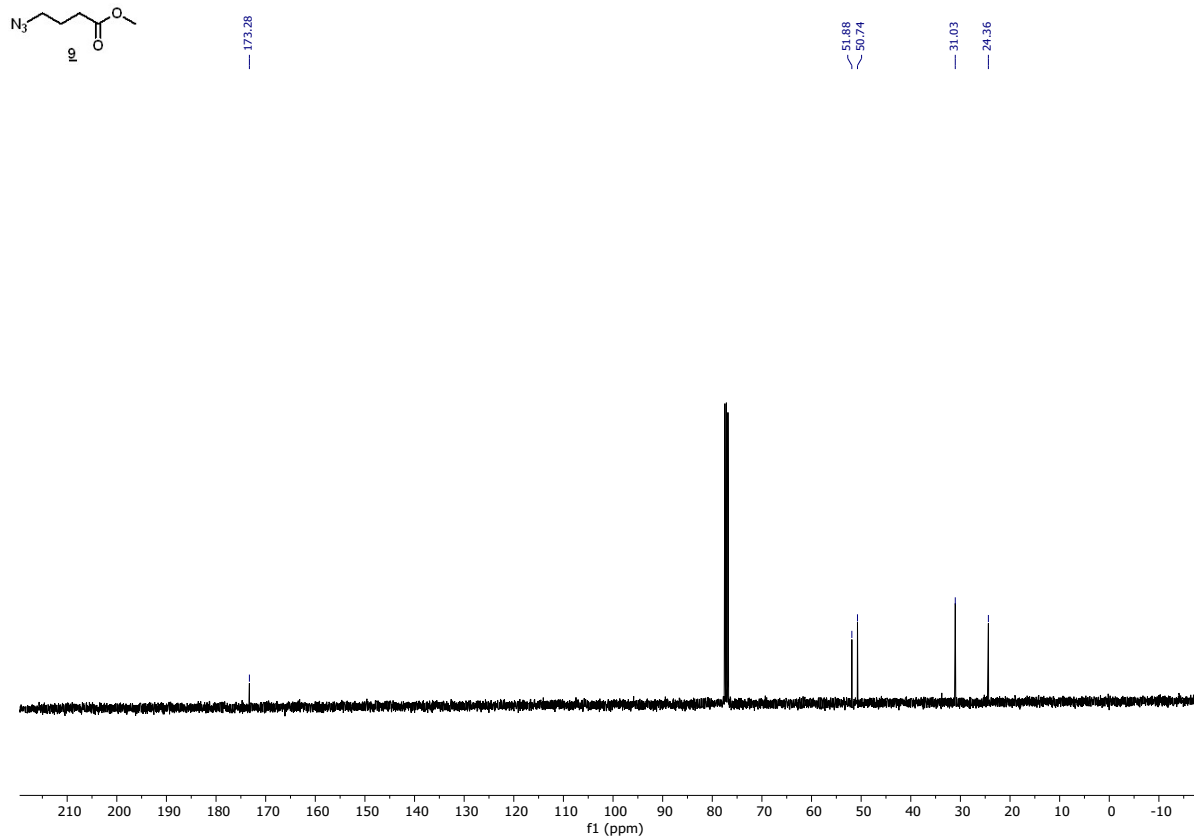

Figure S2: Full <sup>13</sup>C NMR (101 MHz) spectrum for **9**

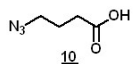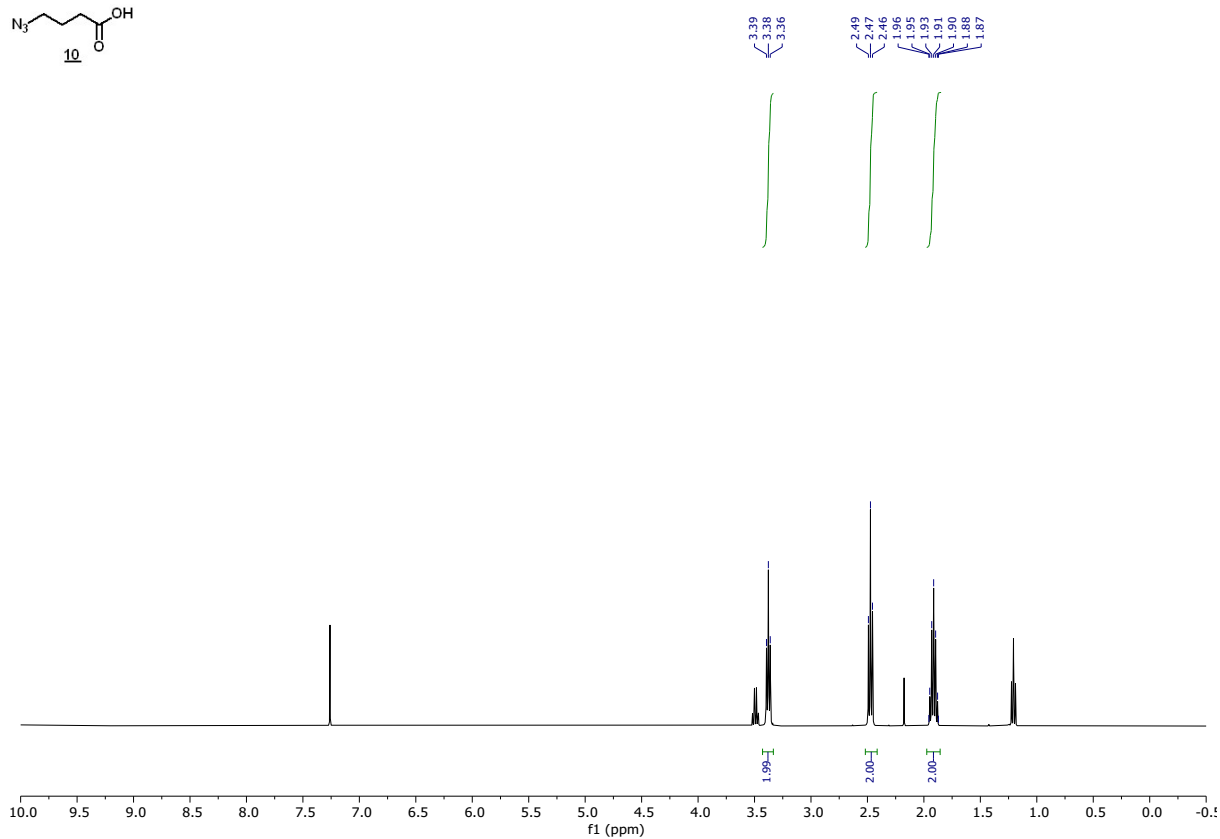

Figure S3: Full  $^1\text{H}$  NMR (400 MHz) spectrum for **10**

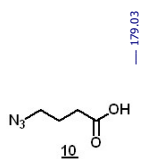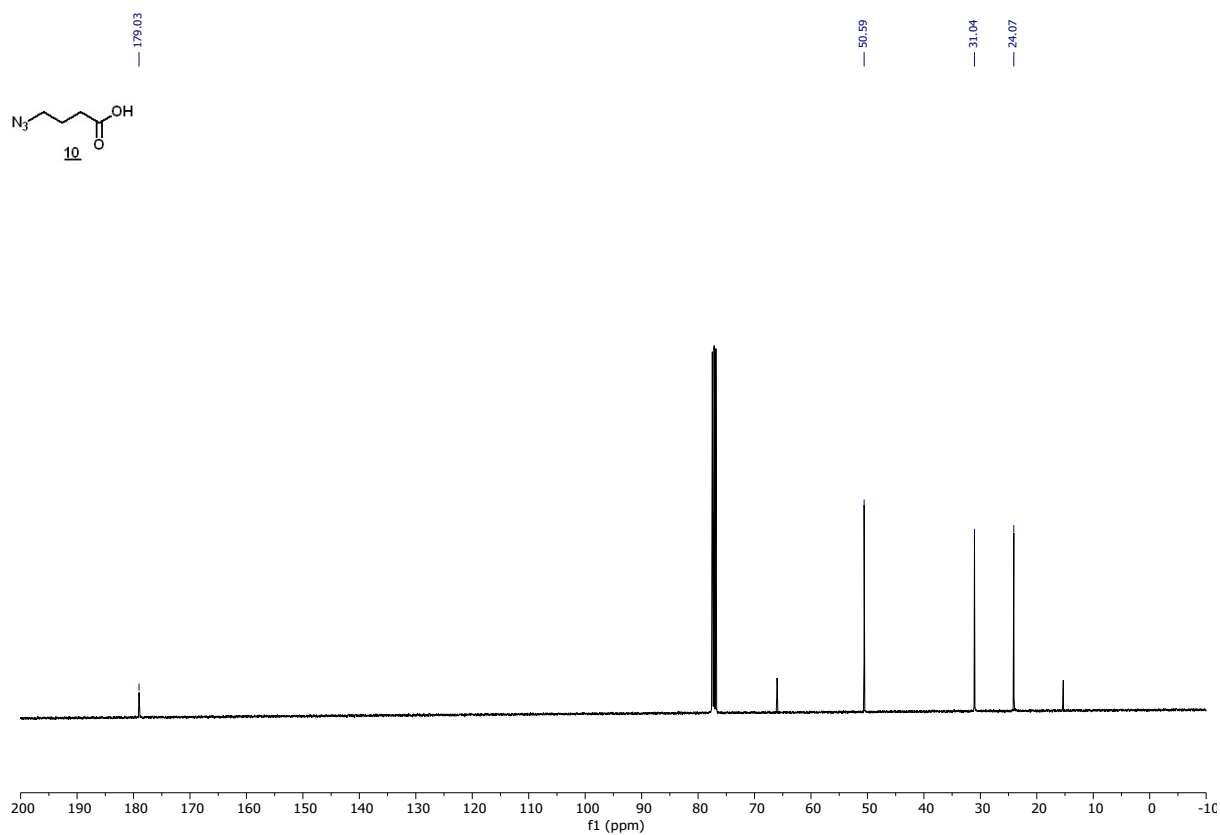

Figure S4: Full  $^{13}\text{C}$  NMR (101 MHz) spectrum for **10**

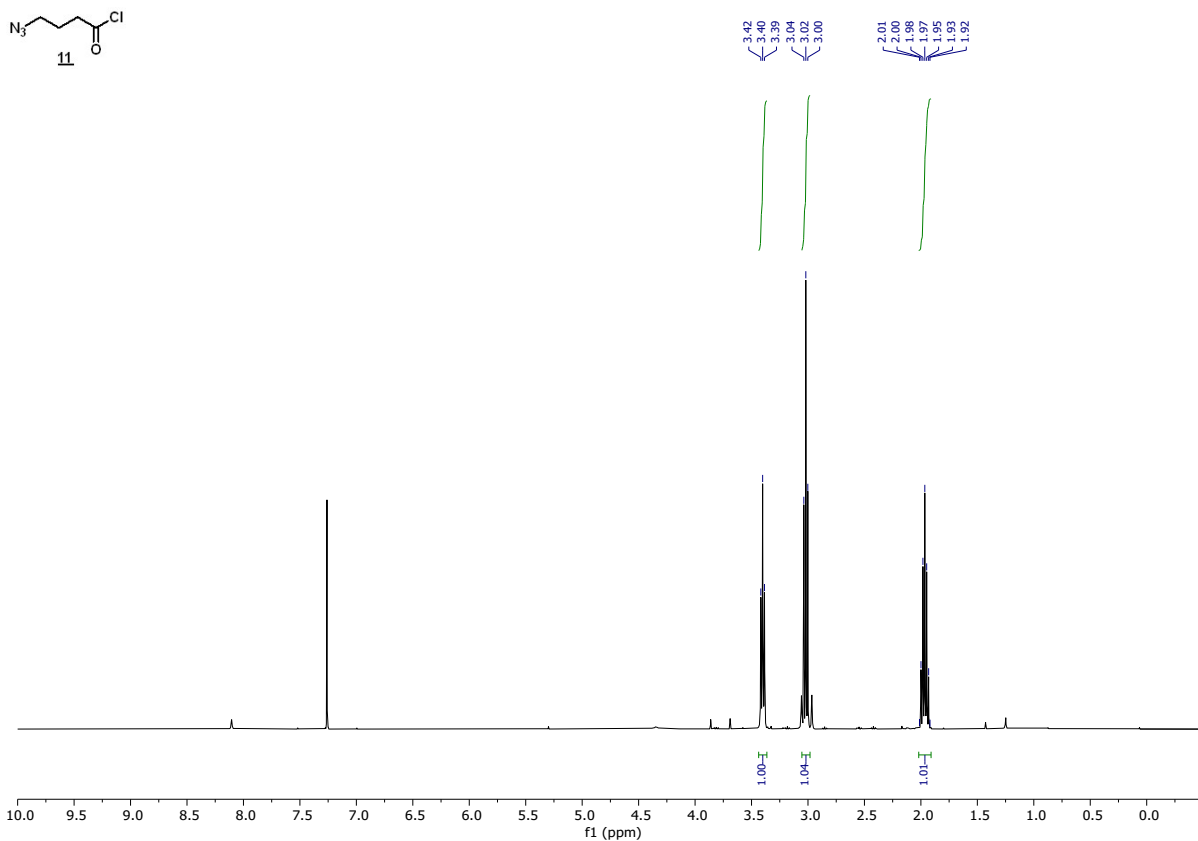

Figure S5: Full  $^1\text{H}$  NMR (400 MHz) spectrum for **11**

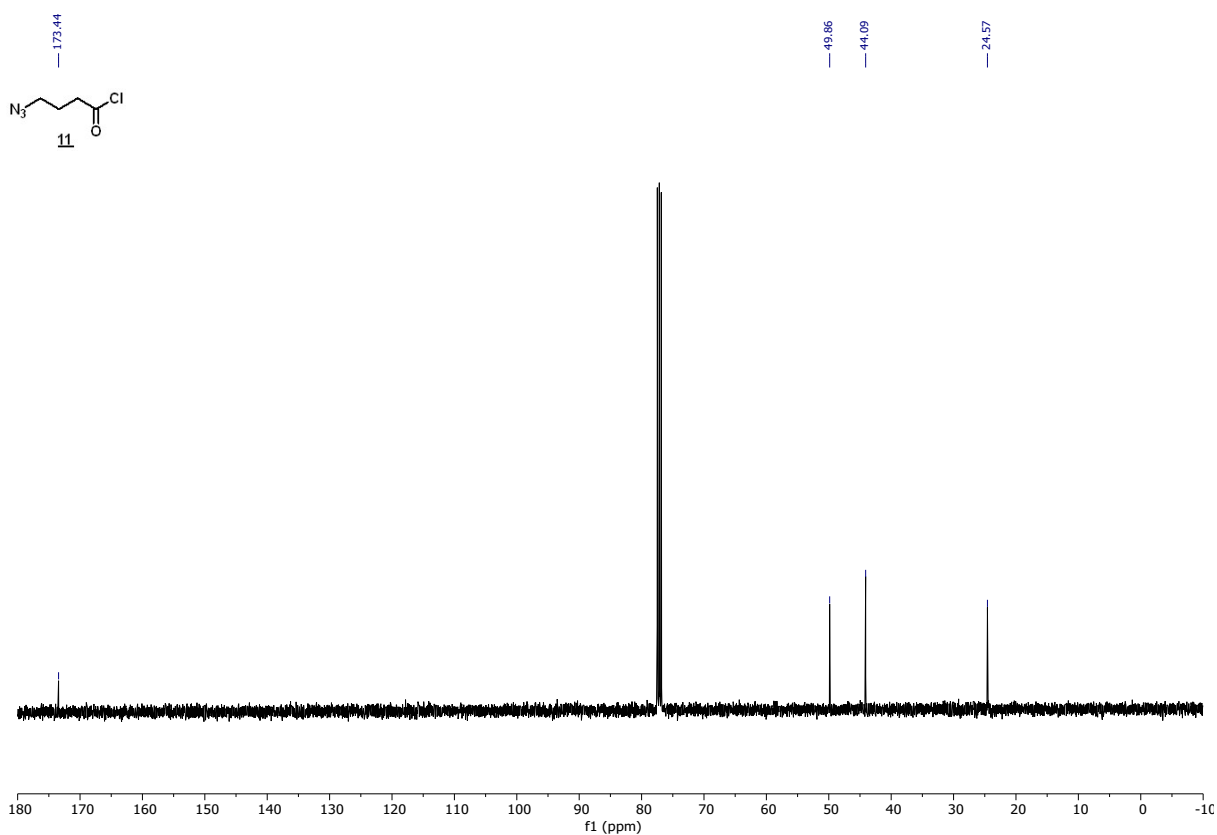

Figure S6: Full  $^{13}\text{C}$  NMR (101 MHz) spectrum for **11**

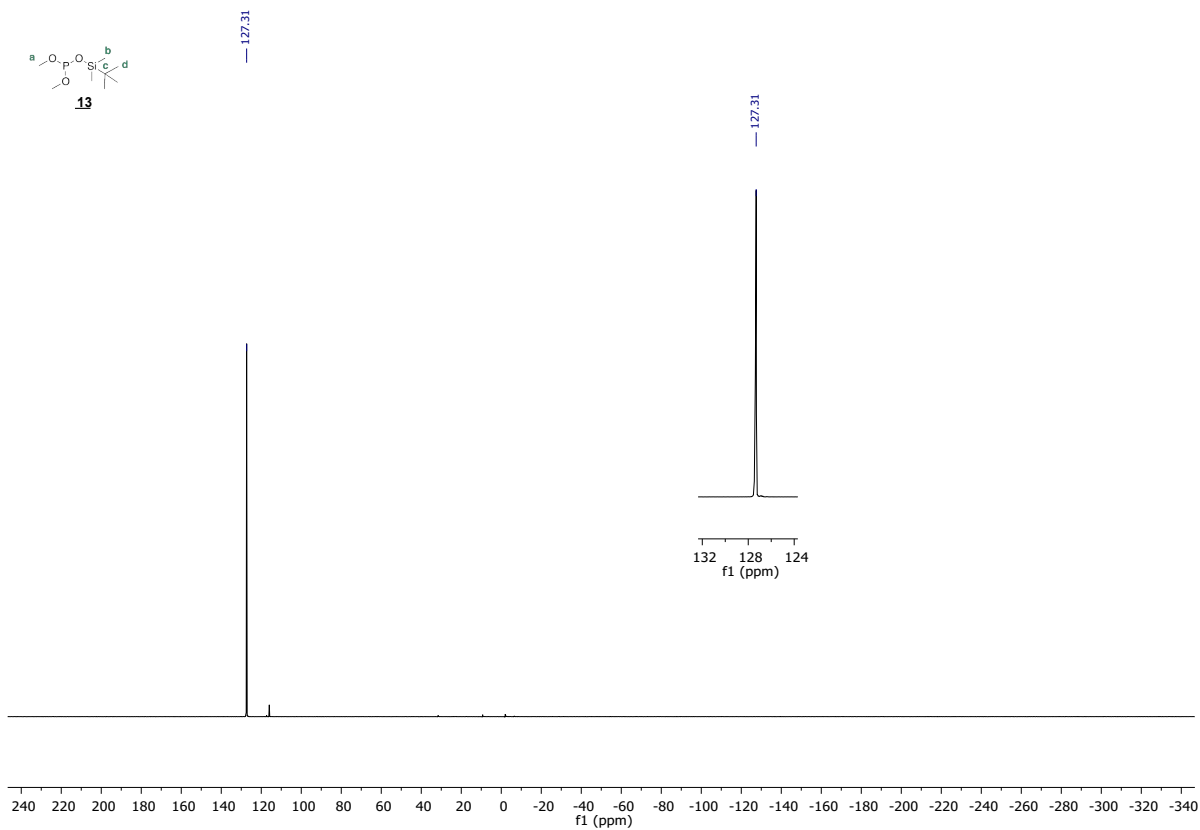

**Figure S7:** Full  $^{31}\text{P}$   $\{^1\text{H}\}$  NMR spectrum, and zoomed  $^{31}\text{P}$  NMR (162 MHz) spectrum for **13**

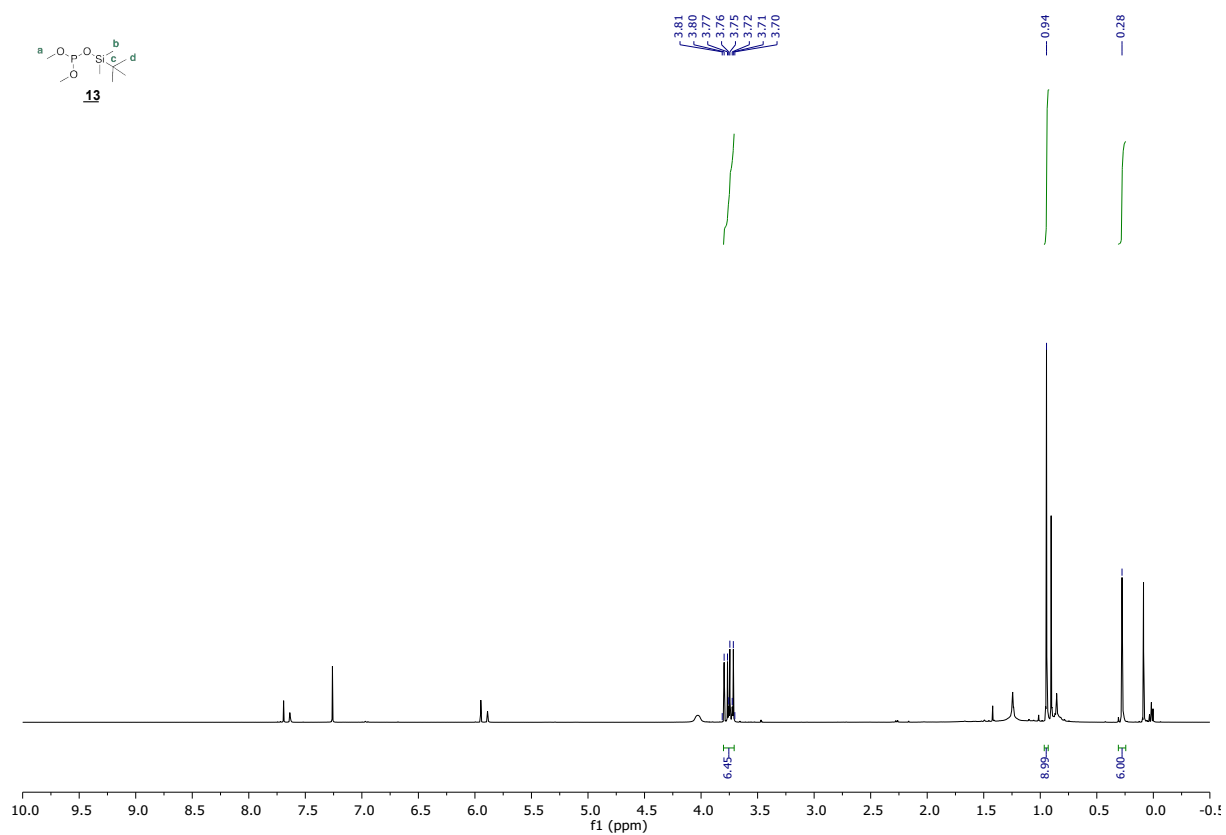

**Figure S8:** Full  $^1\text{H}$  NMR (400 MHz) spectrum for **13**



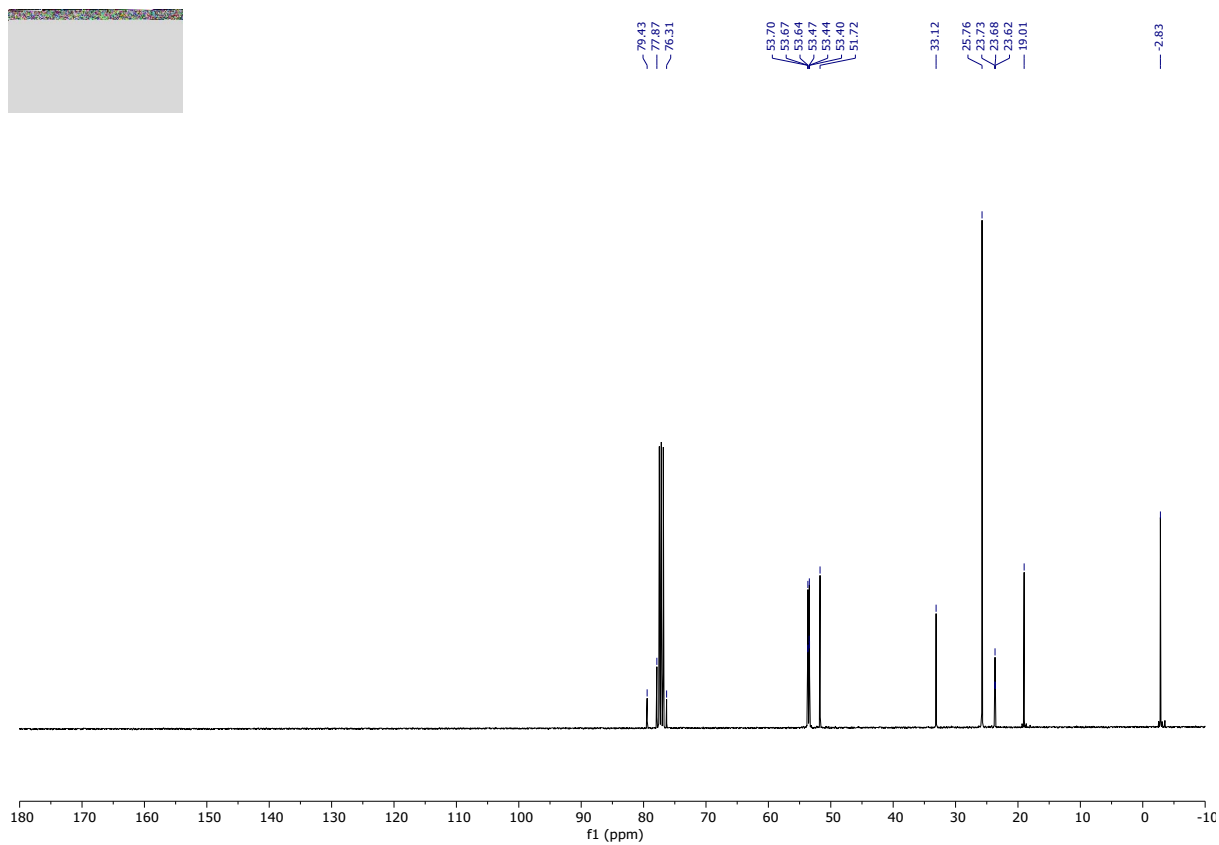

**Figure S11:** Full  $^{13}\text{C}$  NMR (101 MHz) spectrum for **14**

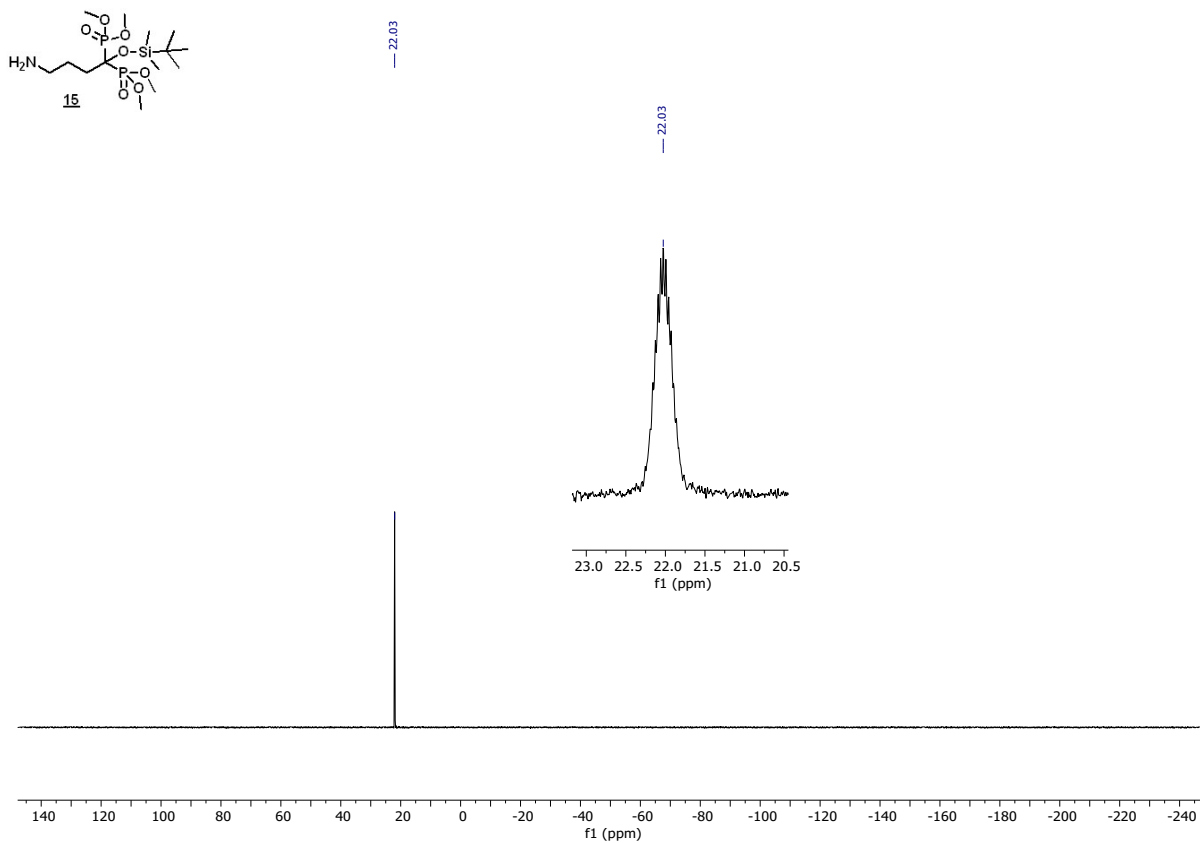

**Figure S12:** Full  $^{31}\text{P}$   $\{^1\text{H}\}$  NMR spectrum, and zoomed  $^{31}\text{P}$  NMR (162 MHz) spectrum for **15**

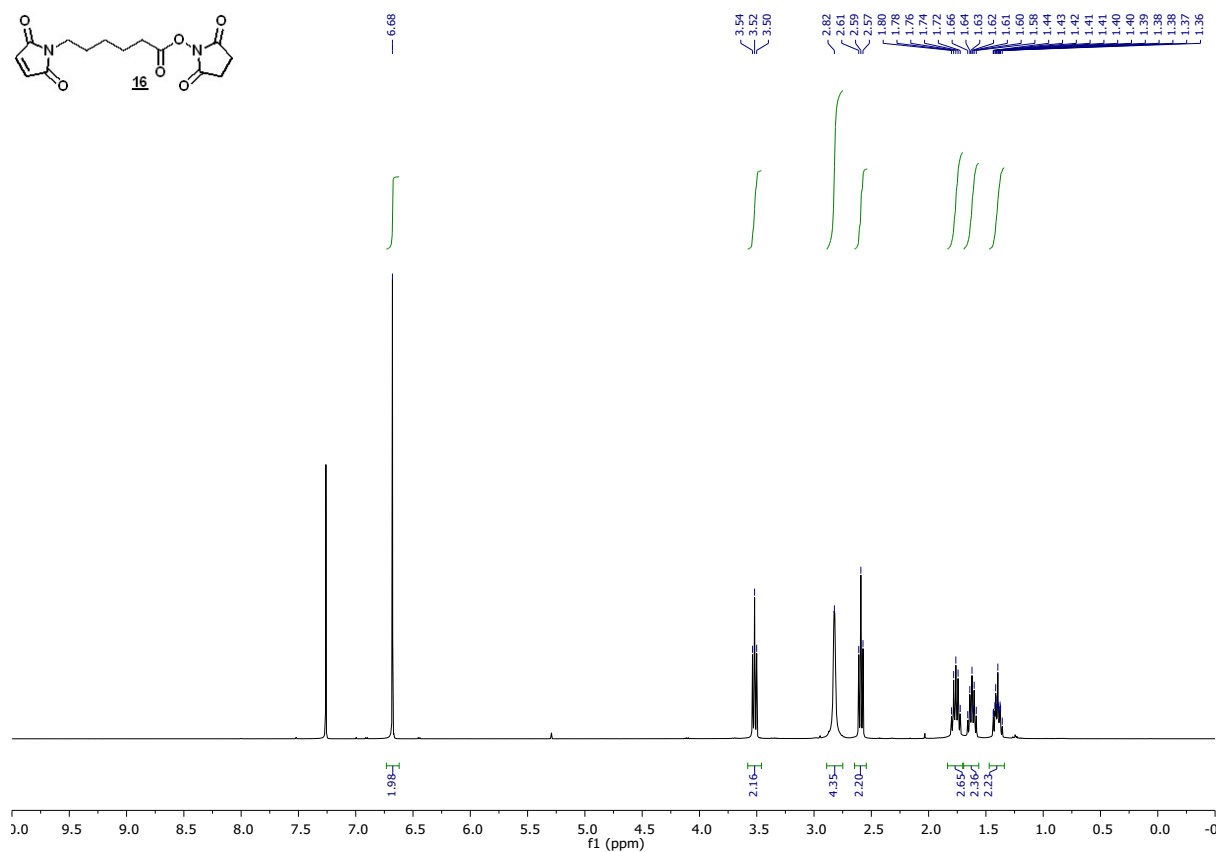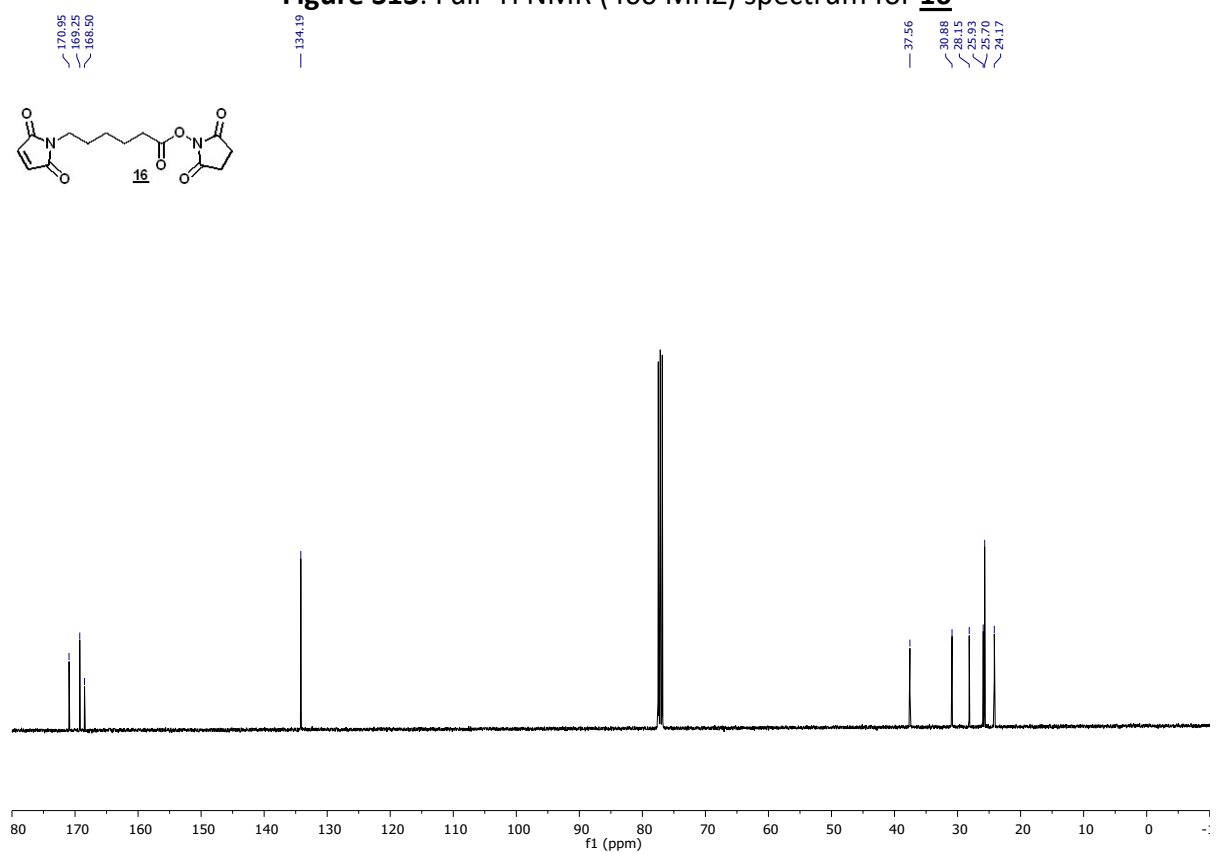





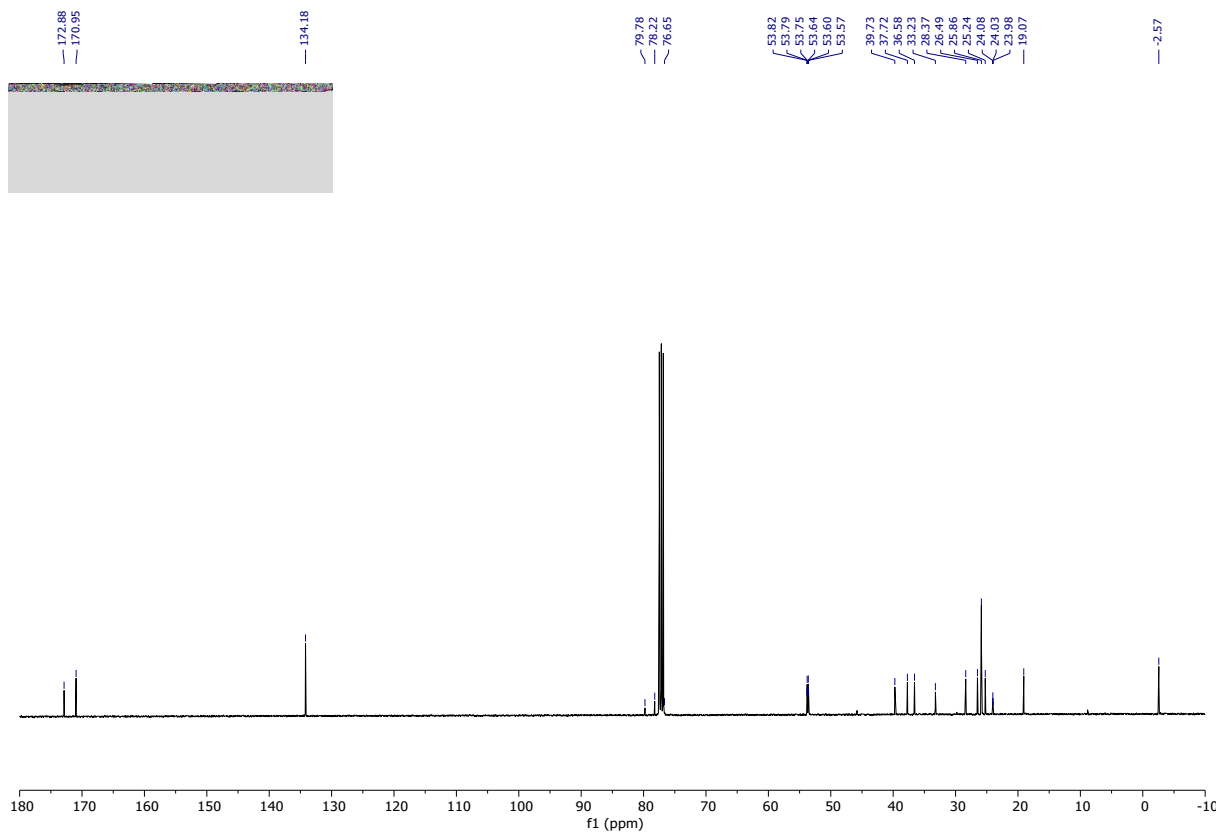

Figure S17: Full  $^{13}\text{C}$  NMR (101 MHz) spectrum for **17**

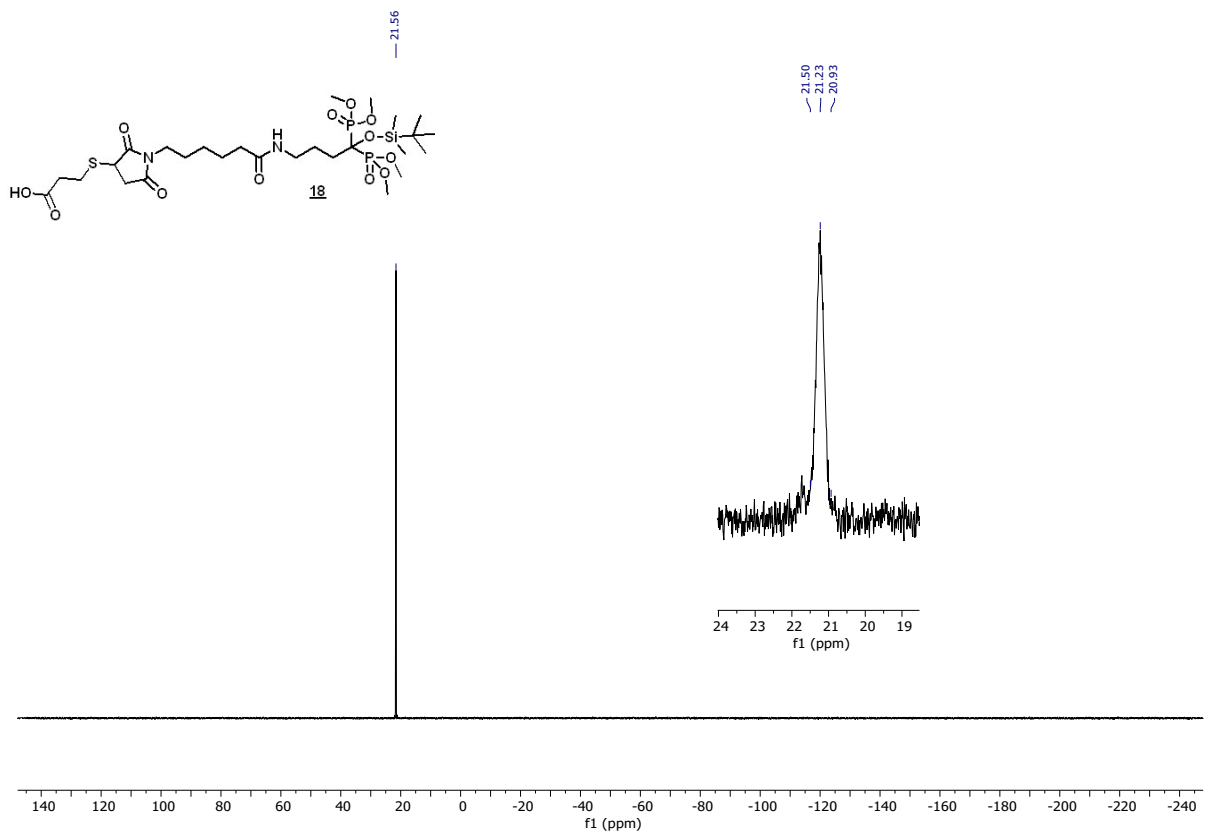

**Figure S18:** Full  $^{31}\text{P}$   $\{^1\text{H}\}$  NMR spectrum, and zoomed  $^{31}\text{P}$  NMR (162 MHz) spectrum for **18**

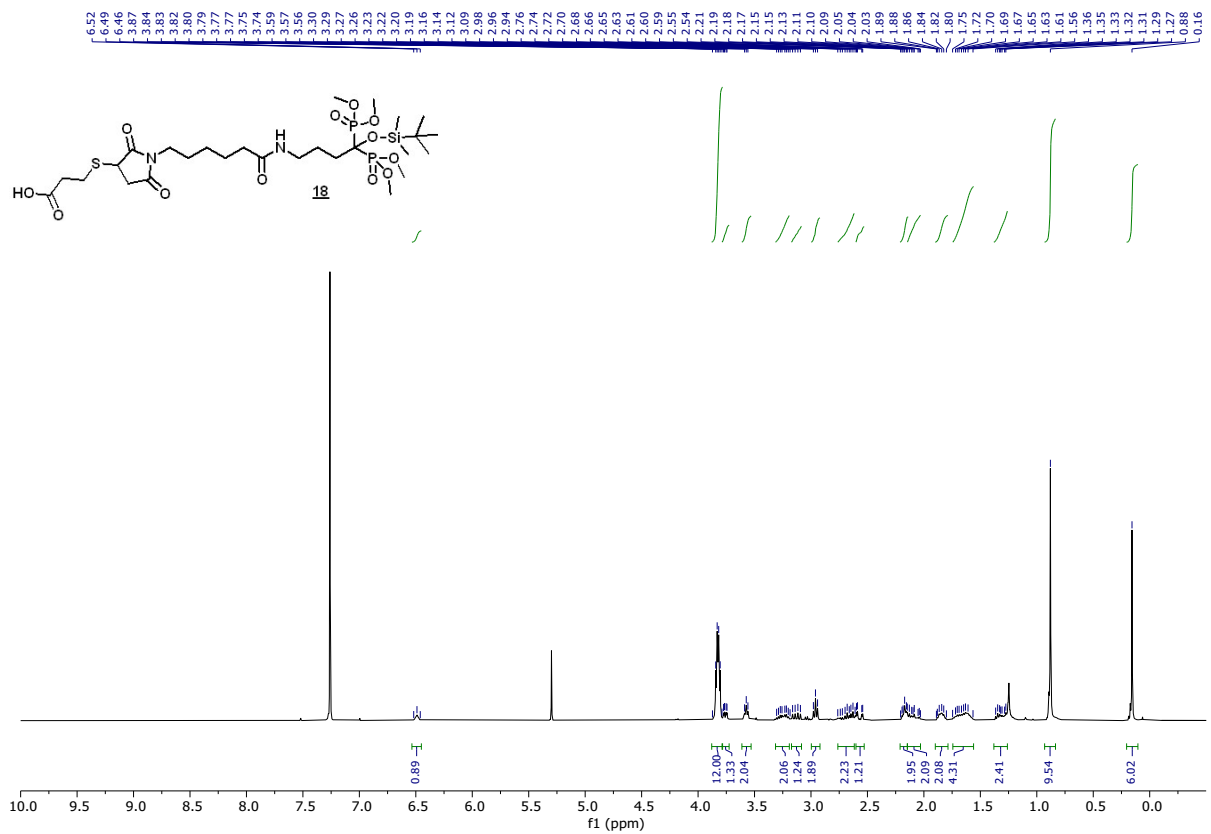

**Figure S19:** Full  $^1\text{H}$  NMR (400 MHz) spectrum for **18**

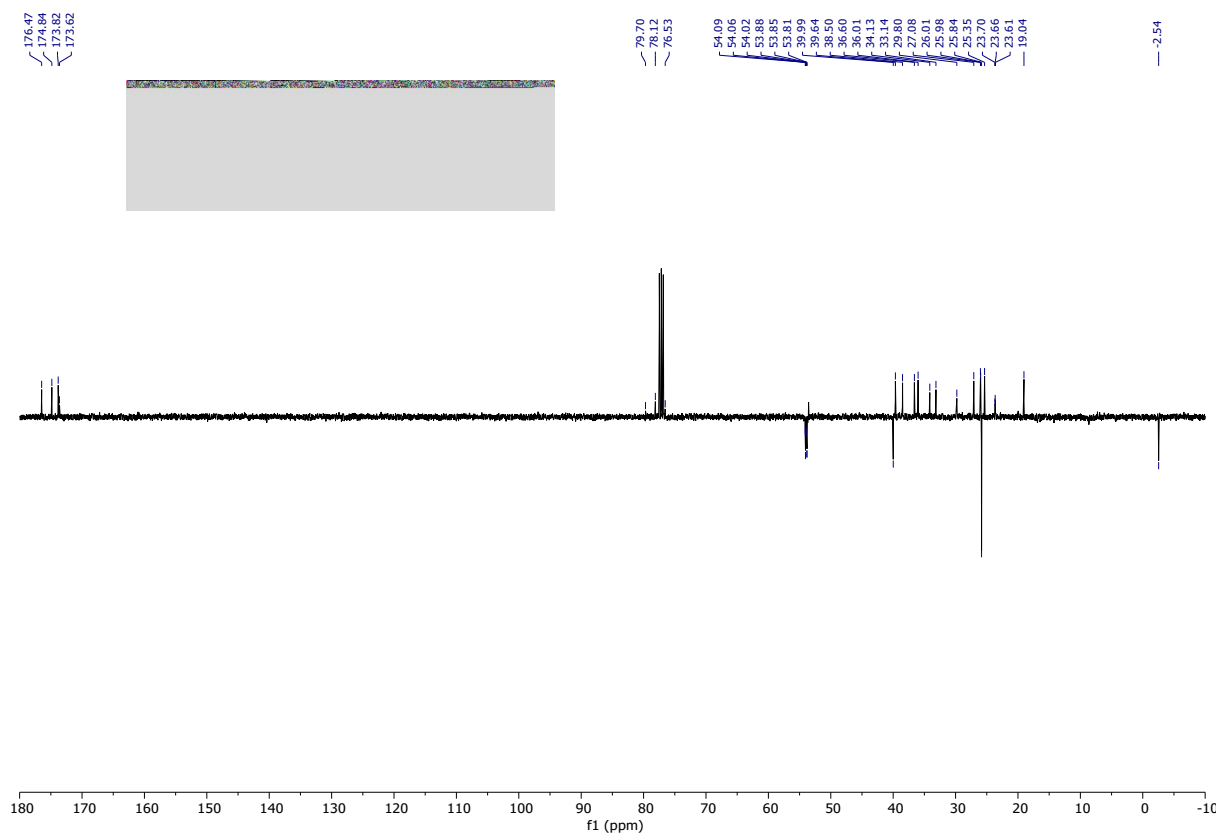

Figure S20: Full  $^{13}\text{C}$  NMR (101 MHz) spectrum for **18**
